# Supplementary material
Source: Springer Nature journal article supplement (https://www.springermedizin.de/resource/supplementary/12874_2012_893_MOESM7_ESM.pdf/9433024)

Figure 3B: Cost-effectiveness acceptability curve for 65-year-old patients

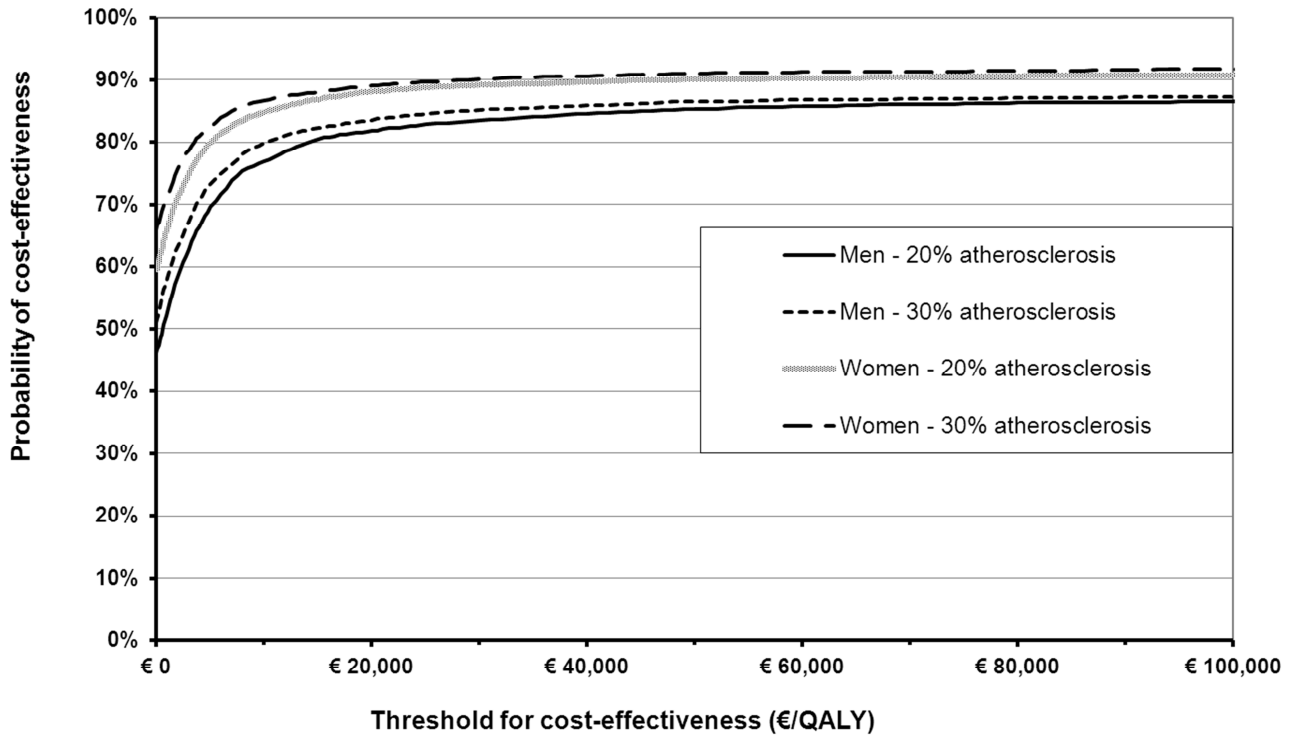

Supplement: MOESM7 [file 9433024]
